# Supplementary material
Source: PubMed Central journal article supplement (PMC5002086)
Supplement: mmc1.pdf [file mmc1.pdf]

**Biophysical Journal, Volume 111**

**Supplemental Information**

**Direct Observation of the Intrinsic Backbone Torsional Mobility of Disordered Proteins**

**Neha Jain, Dominic Narang, Karishma Bhasne, Vijit Dalal, Shruti Arya, Mily Bhattacharya, and Samrat Mukhopadhyay**

## **Supporting Material**

### **Direct Observation of the Intrinsic Backbone Torsional Mobility of Disordered Proteins**

Neha Jain,<sup>‡,§</sup> Dominic Narang,<sup>†,‡,||</sup> Karishma Bhasne,<sup>†,‡</sup> Vijit Dalal,<sup>†,‡</sup> Shruti Arya,<sup>¶</sup> Mily  
Bhattacharya,<sup>¶,Δ</sup> and Samrat Mukhopadhyay<sup>†,‡,||,\*</sup>

<sup>†</sup>Centre for Protein Science, Design and Engineering, <sup>‡</sup>Department of Biological Sciences, and  
<sup>¶</sup>Department of Chemical Sciences, Indian Institute of Science Education and Research (IISER),  
Mohali, Knowledge City, S.A.S. Nagar, Mohali, Punjab, India

\*Correspondence: [mukhopadhyay@iisermohali.ac.in](mailto:mukhopadhyay@iisermohali.ac.in)

<sup>§</sup>Present address: Department of Molecular, Cellular and Developmental Biology, University of Michigan, Ann Arbor, MI, USA

<sup>||</sup>Present address: Department of Chemistry and Biochemistry, University of California San Diego, La Jolla, CA, USA

<sup>Δ</sup>Present address: School of Chemistry and Biochemistry, Thapar University, Patiala, Punjab, India

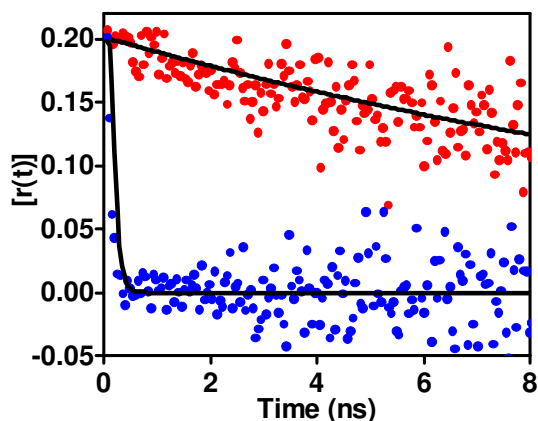

**Fig. S1.** The time-resolved fluorescence anisotropy decays of the tryptophan analog (NATA) in water (blue) and in 80% glycerol-water mixture (red). The black solid lines are fits. NATA in water exhibits a fast depolarization in water with a rotational correlation time of  $\sim 0.1$  ns. The anisotropy decay in highly viscous medium (80% glycerol-water) shows a slow depolarization with an initial anisotropy ( $r_0$ ) of  $\sim 0.2$ .

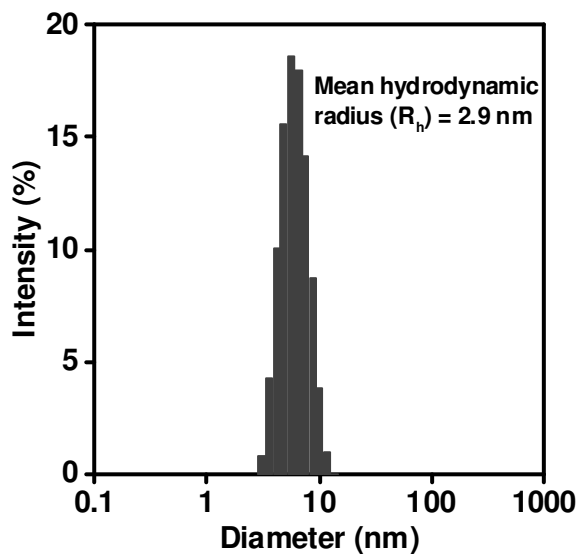

**Fig. S2.** The size-distribution of  $\alpha$ -synuclein obtained using dynamic light scattering experiments. The distribution is devoid of any higher order oligomers and the mean hydrodynamic radius ( $R_h$ ) is  $\sim 3$  nm that is close to previously reported  $R_h$  of  $\alpha$ -synuclein (35).

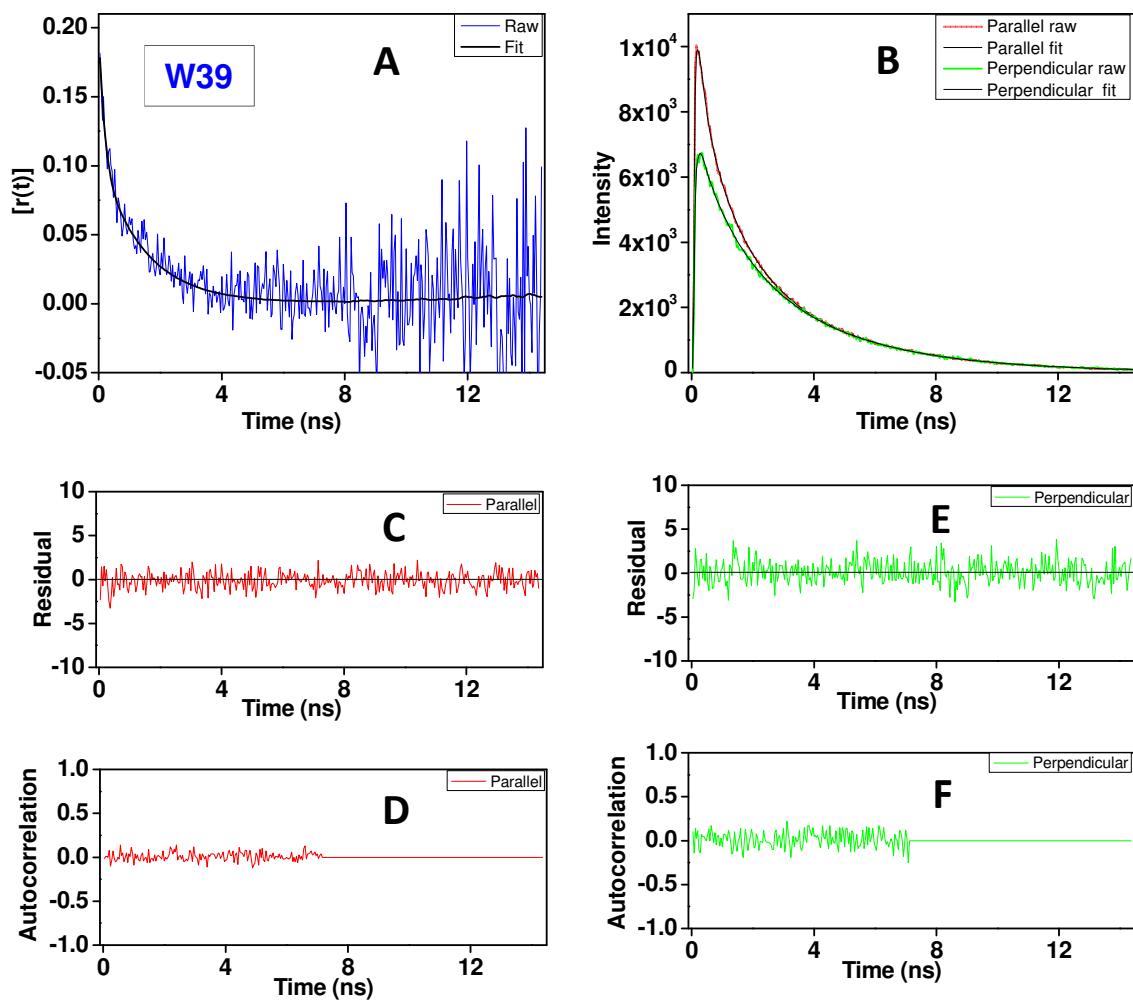

**Fig. S3.** The time-resolved fluorescence anisotropy decay analysis for Trp-39 variant of  $\alpha$ -synuclein. (A) The raw anisotropy data are indicated by blue line, whereas, the fitted decay is shown by solid black line. (B) The global analysis of  $I_{\parallel}(t)$  (red) and  $I_{\perp}(t)$  (green) and corresponding fits are shown using solid black lines. (C) and (D) are the residual plot and the autocorrelation function for  $I_{\parallel}(t)$ , respectively. (E) and (F) are the residual plot and the autocorrelation function for  $I_{\perp}(t)$ , respectively. The recovered parameters are given in Table S1.

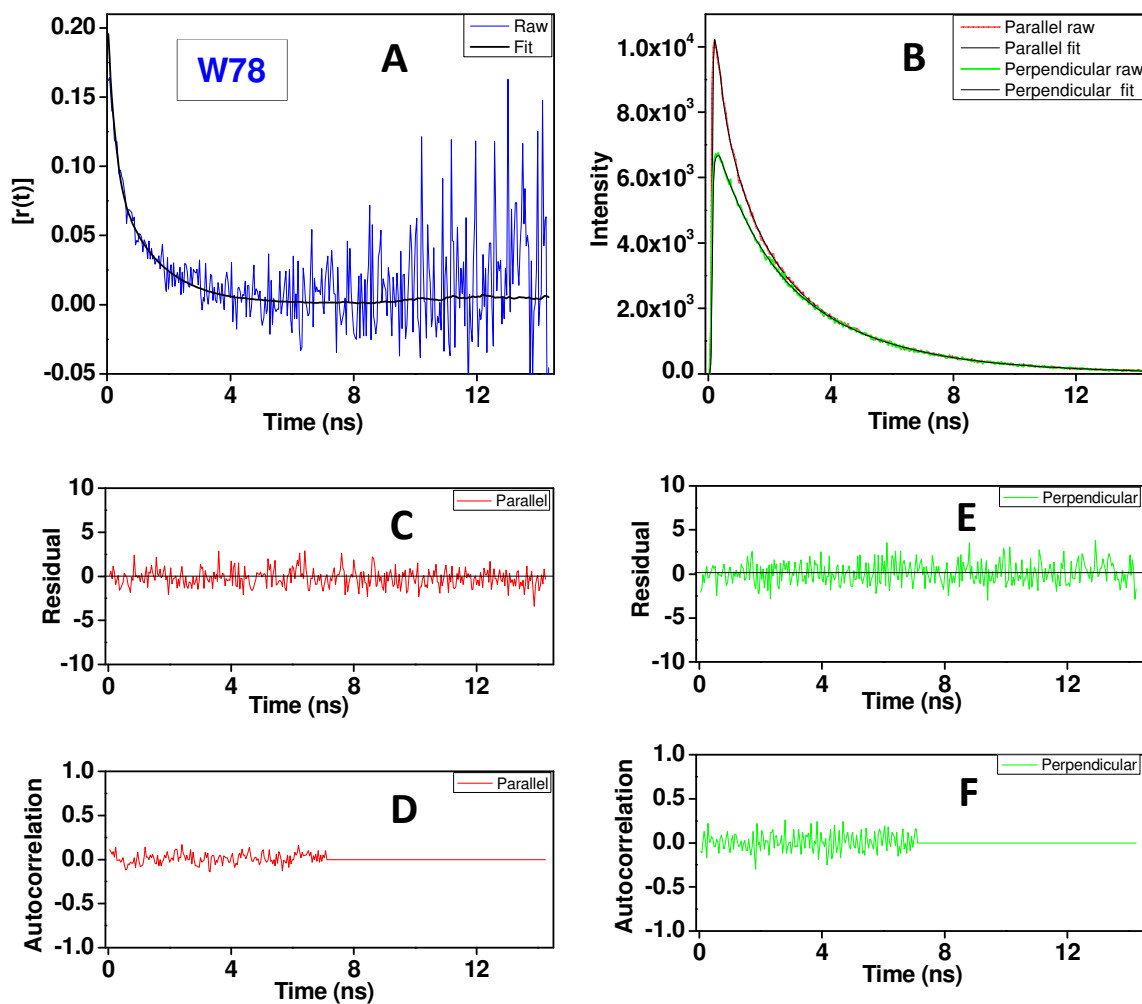

**Fig. S4.** The time-resolved fluorescence anisotropy decay analysis for Trp-78 variant of  $\alpha$ -synuclein. (A) The raw anisotropy data are indicated by blue line, whereas, the fitted decay is shown by solid black line. (B) The global analysis of  $I_{\parallel}(t)$  (red) and  $I_{\perp}(t)$  (green) and corresponding fits are shown using solid black lines. (C) and (D) are the residual plot and the autocorrelation function for  $I_{\parallel}(t)$ , respectively. (E) and (F) are the residual plot and the autocorrelation function for  $I_{\perp}(t)$ , respectively. The recovered parameters are given in Table S1.

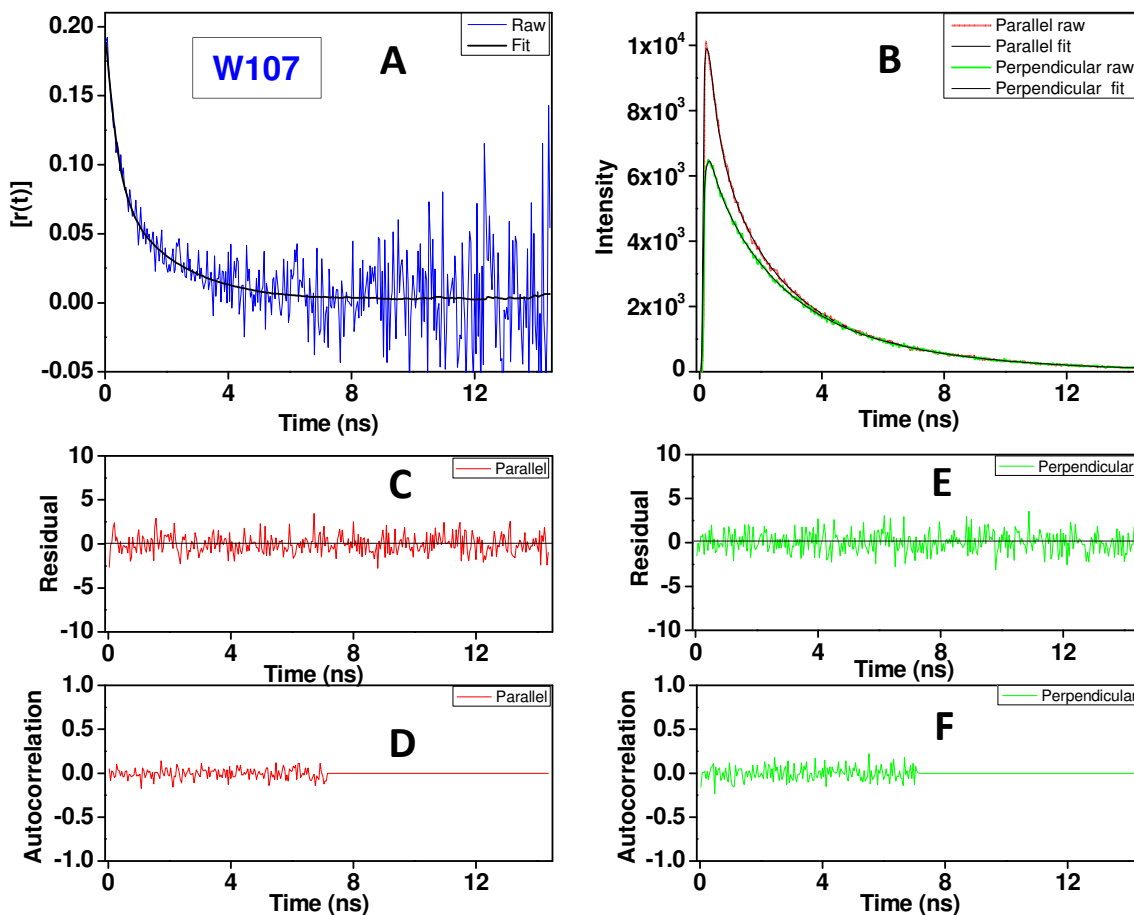

**Fig. S5.** The time-resolved fluorescence anisotropy decay analysis for Trp-107 variant of  $\alpha$ -synuclein. (A) The raw anisotropy data are indicated by blue line, whereas, the fitted decay is shown by solid black line. (B) The global analysis of  $I_{\parallel}(t)$  (red) and  $I_{\perp}(t)$  (green) and corresponding fits are shown using solid black lines. (C) and (D) are the residual plot and the autocorrelation function for  $I_{\parallel}(t)$ , respectively. (E) and (F) are the residual plot and the autocorrelation function for  $I_{\perp}(t)$ , respectively. The recovered parameters are given in Table S1.

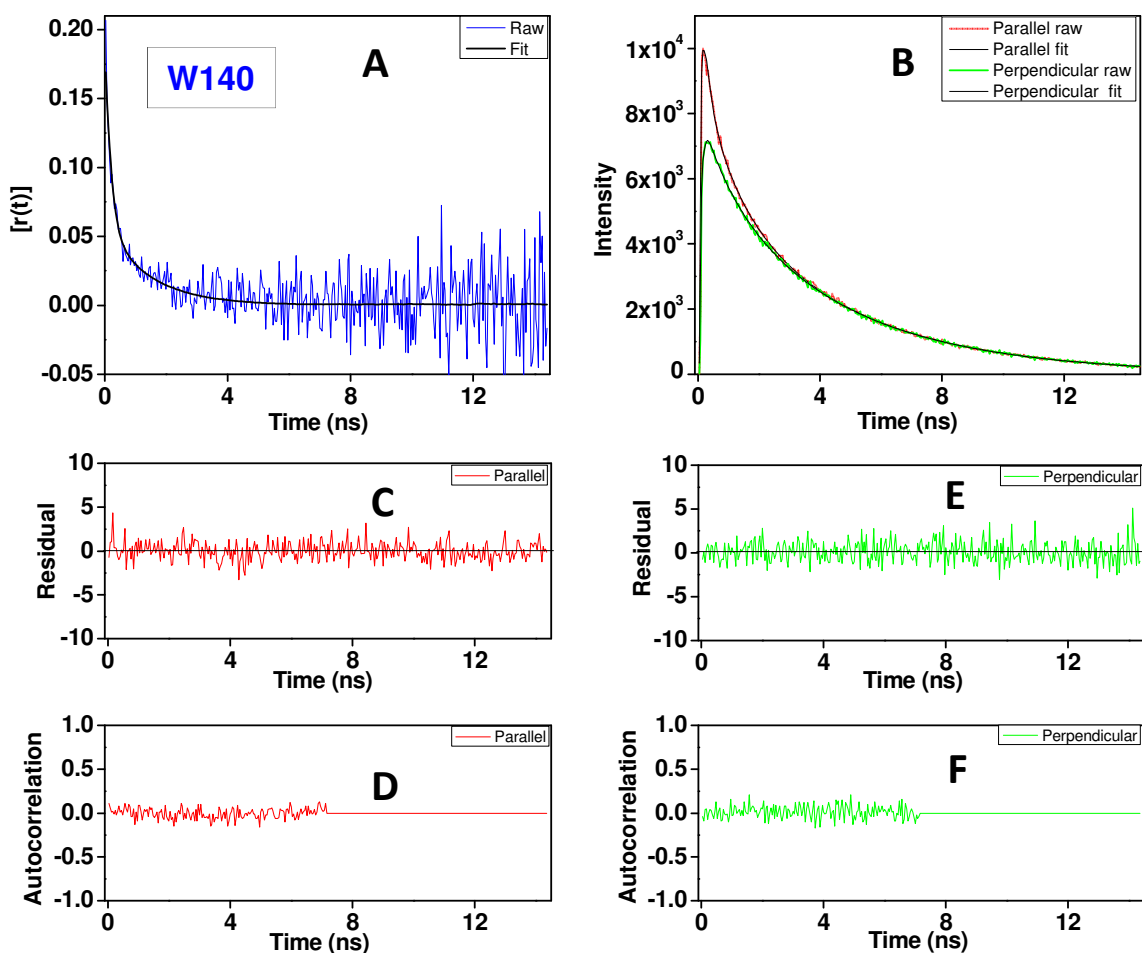

**Fig. S6.** The time-resolved fluorescence anisotropy decay analysis for Trp-140 variant of  $\alpha$ -synuclein. (A) The raw anisotropy data are indicated by blue line, whereas, the fitted decay is shown by solid black line. (B) The global analysis of  $I_{\parallel}(t)$  (red) and  $I_{\perp}(t)$  (green) and corresponding fits are shown using solid black lines. (C) and (D) are the residual plot and the autocorrelation function for  $I_{\parallel}(t)$ , respectively. (E) and (F) are the residual plot and the autocorrelation function for  $I_{\perp}(t)$ , respectively. The recovered parameters are given in Table S1.

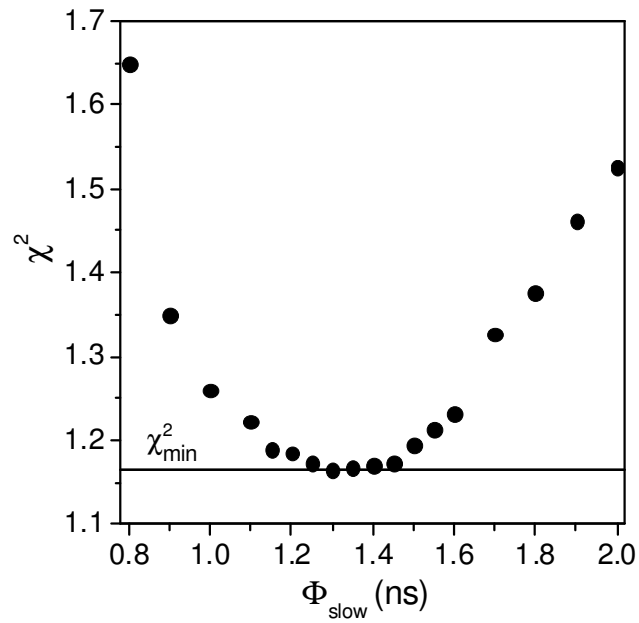

**Fig. S7.** A representative plot of the rotational correlation time ( $\phi$ ) vs. the goodness of fit ( $\chi^2$ ) obtained from forced fits indicating the robustness of the recovered rotational correlation times for Trp-39 variant of  $\alpha$ -synuclein. The best fits (with  $\chi^2_{\text{min}}$ ) are obtained only when  $\phi$  ranges between 1.30 and 1.45 ns.



**Table S1.** Typical parameters associated with the time-resolved fluorescence intensity and anisotropy decays of single Trp variants of  $\alpha$ -synuclein (entry 1-10) and the prion protein (PrP 90-231) containing the (intrinsic) single Trp in the N-terminal segment (entry 11).

| Entry | Trp position | $\tau_m$<br>(in ns)<br>(mean lifetime) | $\phi_{fast}$<br>(in ns) | $\beta_{fast}$ | $\phi_{slow}$<br>(in ns) | $\beta_{slow}$ | $r_0$<br>(initial anisotropy) | $r_{ss}$<br>(steady-state anisotropy) | $\chi^2$ |
|-------|--------------|----------------------------------------|--------------------------|----------------|--------------------------|----------------|-------------------------------|---------------------------------------|----------|
| 1     | 4            | 2.4                                    | 0.12                     | 0.53           | 1.18                     | 0.47           | 0.202                         | 0.034                                 | 1.43     |
| 2     | 27           | 2.2                                    | 0.10                     | 0.37           | 1.15                     | 0.63           | 0.203                         | 0.042                                 | 1.20     |
| 3     | 39           | 2.4                                    | 0.13                     | 0.43           | 1.26                     | 0.57           | 0.200                         | 0.041                                 | 1.17     |
| 4     | 56           | 2.5                                    | 0.10                     | 0.48           | 1.53                     | 0.52           | 0.200                         | 0.039                                 | 1.35     |
| 5     | 69           | 2.2                                    | 0.15                     | 0.58           | 1.30                     | 0.42           | 0.200                         | 0.037                                 | 1.25     |
| 6     | 78           | 2.3                                    | 0.17                     | 0.49           | 1.31                     | 0.51           | 0.198                         | 0.041                                 | 1.21     |
| 7     | 90           | 2.5                                    | 0.17                     | 0.53           | 1.36                     | 0.47           | 0.200                         | 0.038                                 | 1.33     |
| 8     | 107          | 2.3                                    | 0.26                     | 0.52           | 1.86                     | 0.48           | 0.200                         | 0.048                                 | 1.17     |
| 9     | 124          | 2.2                                    | 0.18                     | 0.47           | 1.54                     | 0.53           | 0.200                         | 0.047                                 | 1.31     |
| 10    | 140          | 2.3                                    | 0.16                     | 0.70           | 1.39                     | 0.30           | 0.204                         | 0.023                                 | 1.20     |
| 11    | 99 (PrP)     | 1.5                                    | 0.10                     | 0.51           | 1.29                     | 0.49           | 0.200                         | 0.048                                 | 1.18     |

**Table S2.** Mean rotational correlation times and the standard errors estimated from multiple data acquisition and analysis.

| Entry | Trp position | Mean $\phi_{fast}$ in ns (error) | Mean $\phi_{slow}$ in ns (error) |
|-------|--------------|----------------------------------|----------------------------------|
| 1     | 4            | 0.16 ( $\pm$ 0.04)               | 1.32 ( $\pm$ 0.12)               |
| 2     | 27           | 0.18 ( $\pm$ 0.05)               | 1.47 ( $\pm$ 0.15)               |
| 3     | 39           | 0.15 ( $\pm$ 0.03)               | 1.41 ( $\pm$ 0.14)               |
| 4     | 56           | 0.10 ( $\pm$ 0.02)               | 1.39 ( $\pm$ 0.18)               |
| 5     | 69           | 0.13 ( $\pm$ 0.02)               | 1.24 ( $\pm$ 0.11)               |
| 6     | 78           | 0.16 ( $\pm$ 0.02)               | 1.33 ( $\pm$ 0.16)               |
| 7     | 90           | 0.14 ( $\pm$ 0.02)               | 1.29 ( $\pm$ 0.16)               |
| 8     | 107          | 0.26 ( $\pm$ 0.04)               | 1.79 ( $\pm$ 0.17)               |
| 9     | 124          | 0.15 ( $\pm$ 0.04)               | 1.39 ( $\pm$ 0.17)               |
| 10    | 140          | 0.15 ( $\pm$ 0.02)               | 1.35 ( $\pm$ 0.17)               |
| 11    | 99 (PrP)     | 0.14 ( $\pm$ 0.04)               | 1.39 ( $\pm$ 0.19)               |
